# Supplementary material for: Estrogen ameliorates microglial activation by inhibiting the Kir2.1 inward-rectifier K+ channel
Source: PubMed Central journal article supplement (PMC4785403; doi:10.1038/srep22864), 2016-03-10

1 **Supplementary materials**

2 **Estrogen ameliorates microglial activation by inhibiting the Kir2.1**

3 **inward-rectifier K<sup>+</sup> channel**

4

5 Shih-Ying Wu\*<sup>1</sup>, Yun-Wen Chen\*<sup>2,3</sup>, Sheng-Feng Tsai<sup>1</sup>, Sheng-Nan Wu<sup>4</sup>, Yao-Hsiang

6 Shih<sup>1</sup>, Ya-Fen Jiang-Shieh<sup>2</sup>, Ting-Ting Yang<sup>3,#</sup>, Yu-Min Kuo<sup>1,2,#</sup>

7

8 <sup>1</sup>Institute of Basic Medical Sciences, National Cheng Kung University, Tainan,

9 Taiwan

10 <sup>2</sup>Department of Cell Biology and Anatomy, National Cheng Kung University, Tainan,

11 Taiwan

12 <sup>3</sup>Department of Chinese Medicine for Post-Baccalaureate, I-Shou University,

13 Kaohsiung, Taiwan

14 <sup>4</sup>Department of Physiology, National Cheng Kung University, Tainan, Taiwan

15

16 \*These authors contributed equally to this paper.

17

18

19 **#Corresponding authors:**

20 T. T. Yang, Department of Chinese Medicine for Post-Baccalaureate, I-Shou

21 University, Kaohsiung, Taiwan. E-mail: [tingting.taiwan@gmail.com](mailto:tingting.taiwan@gmail.com)

22

23 Y. M. Kuo, Department of Cell Biology and Anatomy, National Cheng Kung

24 University Medical College. 1 Ta Hsueh Road, Tainan 70101, Taiwan. Tel.:

25 +886-6-235-3535 ext. 5294; Fax: +886-6-209-3007. E-mail:

26 [kuoym@mail.ncku.edu.tw](mailto:kuoym@mail.ncku.edu.tw)

1  
2

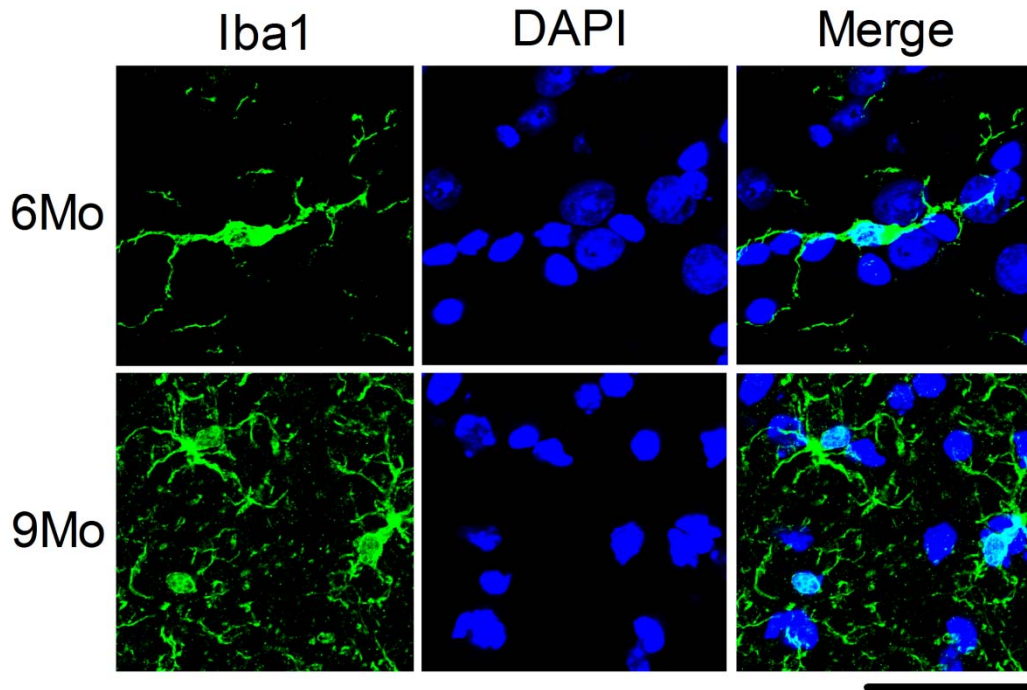

3  
4  
5  
6  
7  
8  
9  
10  
11

**Supplementary Figure S1. Confocal immunofluorescence microscopy images of Iba1<sup>+</sup> cells in the SNs of 6- and 9-month-old male mice. Scale bar: 20  $\mu$ m. 6Mo: 6-month-old; 9Mo: 9-month-old.**

1

2

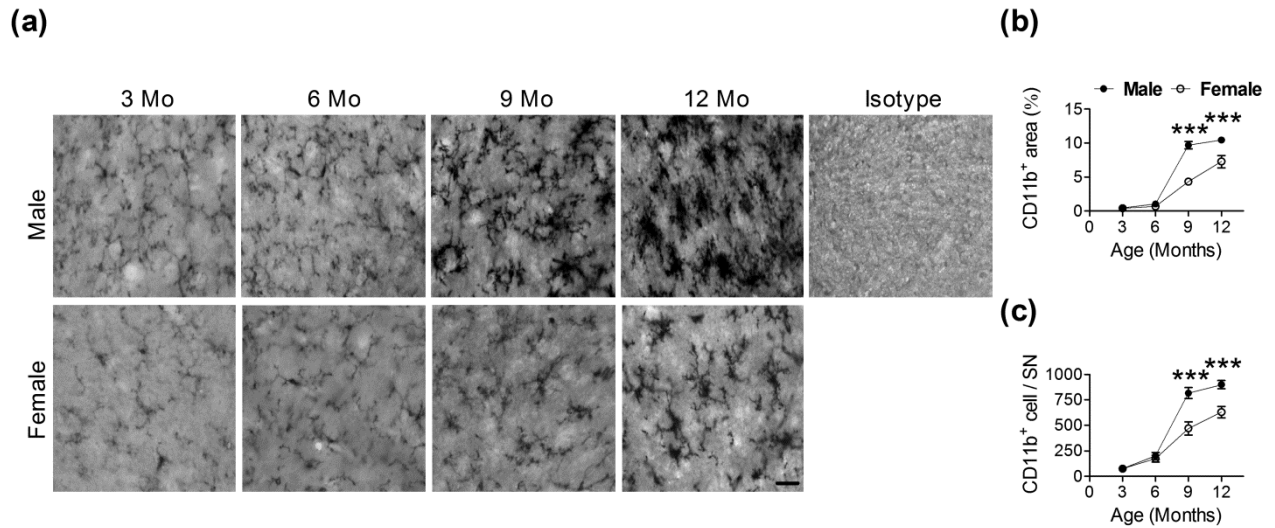

3

4

5

6

7

8 **Supplementary Figure S2. Temporal profiles of microglia in the SN of female and**

9 **male C57BL/6J mice. (a)** Representative immunostained micrographs show CD11b<sup>+</sup>

10 cells in the SN of 3-, 6-, 9-, and 12-month-old female and male mice. Scale bar: 10

11  $\mu\text{m}$ . Quantitative results of CD11b<sup>+</sup> cell areas **(b)** and the number of Iba1<sup>+</sup> cells **(c)** in

12 the SN of female and male mice at different ages (n = 5). \*\*\* (p < 0.001): versus the

13 opposite sex.

14

15

16

17

1  
2

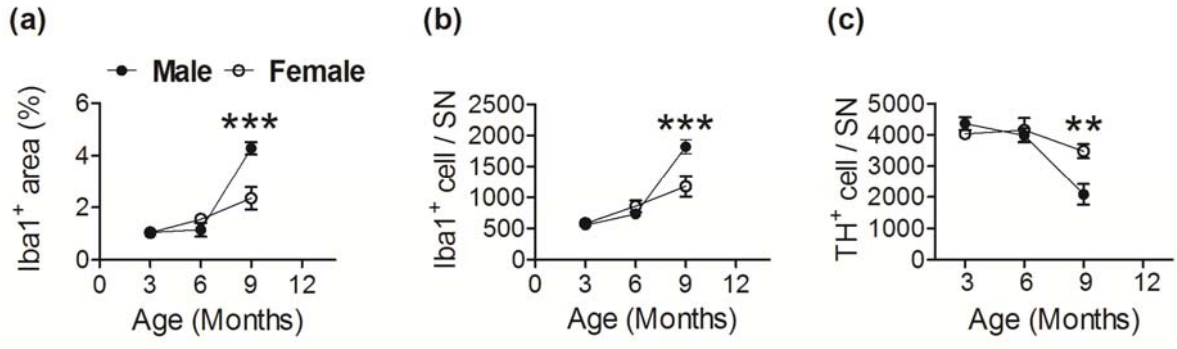

3  
4  
5  
6  
7

8 **Supplementary Figure S3. Temporal profiles of microglia and DA neurons in the**  
9 **SN of female and male BALB/c mice. (a,b,c)** Quantitative results of Iba1<sup>+</sup> cell areas  
10 **(a)** and the number of Iba1<sup>+</sup> cells **(b)** and the number of TH<sup>+</sup> cells **(c)** in the SN of  
11 female and male mice at different ages (n = 4). \*\* (*p* < 0.01), \*\*\* (*p* < 0.001): versus  
12 the opposite sex.

13  
14  
15  
16  
17  
18  
19

1  
2

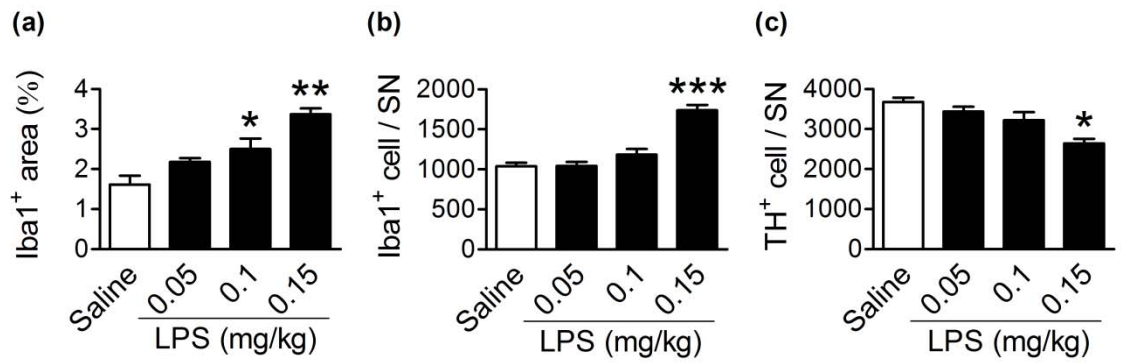

3  
4  
5  
6  
7  
8  
9  
10  
11  
12  
13  
14  
15  
16  
17  
18  
19  
20

**Supplementary Figure S4. Dose effects of LPS on microglial activation and DA neuron loss in the SN of 3-month-old male mice.** Dose effects of LPS on (a) Iba1<sup>+</sup> cell areas, (b) the number of Iba1<sup>+</sup> cells, and (c) the number of TH<sup>+</sup> cells in the SN of 3-month-old male mice (n = 4). \* (p < 0.05), \*\* (p < 0.01), \*\*\* (p < 0.001): versus Saline controls.

1  
2

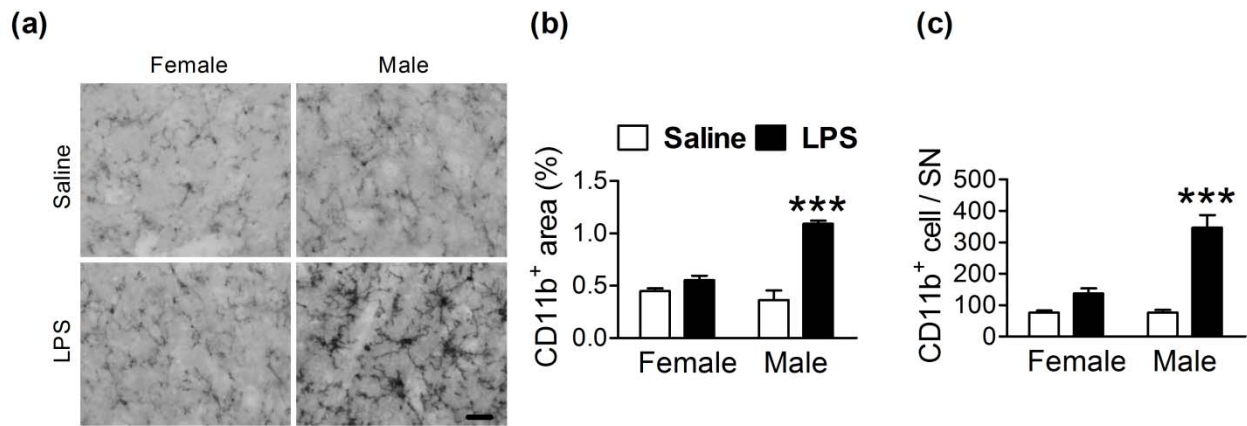

3  
4  
5  
6  
7

8 **Supplementary Figure S5. Differential effects of LPS on microglial activation in**  
9 **the SN of female and male mice.** (a) Representative immunostained micrographs  
10 show CD11b<sup>+</sup> cells in the SN of female and male mice 1 day after an LPS (0.15  
11 mg/kg of body weight, i.p.) injection. Scale bar: 10  $\mu$ m. Quantitative results of  
12 CD11b<sup>+</sup> cell areas (b) and the number of CD11b<sup>+</sup> cells (c) in the SN of female and  
13 male mice 1 day after an LPS injection (n = 5-6). \*\*\* ( $p < 0.001$ ): versus respective  
14 Saline group.

15  
16  
17  
18  
19  
20

1 **Supplementary Table S1. Body weight of C57BL/6J mice.**

2

3

| Age<br>(months) |        | Sample<br>size | Mean $\pm$ SEM<br>(g) | coefficient of<br>variation (%) |
|-----------------|--------|----------------|-----------------------|---------------------------------|
| 3               | male   | 8              | 21.7 $\pm$ 0.7        | 9.2                             |
|                 | female | 10             | 21.4 $\pm$ 0.3        | 4.8                             |
| 6               | male   | 8              | 26.2 $\pm$ 0.6        | 6.2                             |
|                 | female | 7              | 25.5 $\pm$ 0.8        | 8.4                             |
| 9               | male   | 8              | 29.7 $\pm$ 0.6        | 5.6                             |
|                 | female | 5              | 28.2 $\pm$ 0.6        | 4.9                             |
| 12              | male   | 4              | 33.3 $\pm$ 1.1        | 6.6                             |
|                 | female | 7              | 29.6 $\pm$ 0.8        | 7.5                             |

4

1 **Supplementary Table S2. The health monitoring annual report of C57BL/6J**  
 2 **mice.**

Laboratory Animal Center of National Cheng Kung University  
 Health monitoring report

Location : Tainan, Taiwan

Report date : 25 Jan,2016

Area : 12F Clean

ROOM : CH32-H

Specics : Mouse

|                                  | Current<br>POS/TSTD | 12Months<br>POS/TSTD | Methods                         |
|----------------------------------|---------------------|----------------------|---------------------------------|
| Mouse Hepatitis virus            | 0/1                 | 0/5                  | ELISA                           |
| Pneumonia Virus of Mice          | 0/1                 | 0/5                  | ELISA                           |
| TMEV                             | 0/1                 | 0/5                  | ELISA                           |
| Mouse adenovirus (MAd)           | 0/1                 | 0/5                  | ELISA                           |
| Mouse parvovirus (MPV)           | 0/1                 | 0/5                  | ELISA                           |
| Mycoplasma pulmonis              | 0/1                 | 0/5                  | ELISA                           |
| Murine norovirus                 | 0/1                 | 0/5                  | ELISA                           |
| Minute virus of mice (MVM)       | 0/1                 | 0/5                  | ELISA                           |
| Hantaan virus                    | 0/1                 | 0/2                  | ELISA                           |
| Sendai virus                     | 0/1                 | 0/3                  | ELISA                           |
| Ectromelia virus (Mouse Pox)     | 0/1                 | 0/3                  | ELISA                           |
| Reovirus 3 (Reo 3)               | 0/1                 | 0/3                  | ELISA                           |
| LCMV                             | 0/1                 | 0/2                  | ELISA                           |
| <i>Bordetella bronchiseptica</i> | 0/1                 | 0/3                  | Culture                         |
| <i>Corynebacterium kutscheri</i> | 0/1                 | 0/3                  | Culture                         |
| <i>Salmonella</i> spp.           | 0/1                 | 0/3                  | Culture                         |
| <i>Pseudomonas aeruginosa</i>    | 0/1                 | 0/3                  | Culture                         |
| <i>Helicobacter</i> spp.         | 0/1                 | 0/3                  | PCR                             |
| <i>Pneumocystis murina</i>       | 0/1                 | 0/3                  | PCR                             |
| Endoparasites- Helminths         |                     |                      |                                 |
| <i>Aspicularis tetraptera</i>    | 0/1                 | 0/3                  | Direct exam. and flotation test |
| <i>Hymenolpis diminuta</i>       | 0/1                 | 0/3                  | Direct exam. and flotation test |
| <i>Rodentolepis nana</i>         | 0/1                 | 0/3                  | Direct exam. and flotation test |
| <i>Syphacia</i> spp.             | 0/1                 | 0/3                  | Direct exam. and flotation test |
| Ectoparasites                    |                     |                      |                                 |
| Flea                             | 0/1                 | 0/3                  | Clinical exam and necropsy      |
| Louse                            | 0/1                 | 0/3                  | Clinical exam and necropsy      |
| Mite                             | 0/1                 | 0/3                  | Clinical exam and necropsy      |

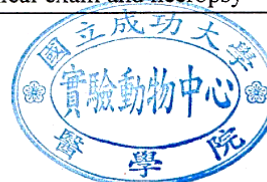

Supplement: srep22864-s1.pdf [file srep22864-s1.pdf]
